# Supplementary material for: A data-driven topsoil δ&lt;sup&gt;13&lt;/sup&gt;C dataset and the drivers of spatial variability across the Tibetan Plateau
Source: Copernicus journal article supplement (doi:10.5194/essd-2021-411), 2021-11-20
Supplement: Supplementary file 1 [file essd-2021-411-supplement.pdf]

1  
2  
3  
4  
5  
6  
7  
8  
9  
10  
11  
12  
13  
14  
15  
16  
17  
18  
19  
20  
21  
22  
23  
24  
25  
26  
27  
28  
29  
30  
31  
32

## Supplement materials of

### A data-driven topsoil $\delta^{13}\text{C}$ dataset and the drivers of spatial variability across the Tibetan Plateau

Yunsen Lai<sup>1</sup>, Shaoda Li<sup>1, \*</sup>, Yuehong Shi<sup>1</sup>, Xinrui Luo<sup>1</sup>, Liang Liu<sup>1</sup>, Peng Yu<sup>1</sup>,  
Guo Chen<sup>2</sup>, Longxi Cao<sup>2</sup>, Chunju Cai<sup>3</sup>, Jian Sun<sup>4</sup>, Shaohui Chen<sup>5</sup>, Houyuan  
Lu<sup>6, 7, 8</sup>, Xuanlong Ma<sup>9</sup>, Xiaolu Tang<sup>2, 10, \*</sup>

<sup>1</sup> College of Earth Science, Chengdu University of Technology, Chengdu 610059,  
Chengdu, China

<sup>2</sup> College of Ecology and Environment, Chengdu University of Technology, Chengdu  
610059, Chengdu, China

<sup>3</sup> Key Laboratory of Bamboo and Rattan Science and Technology of National Forestry  
and Grassland Administration, International Centre for Bamboo and Rattan, Beijing  
100102, China

<sup>4</sup> Key Laboratory of Alpine Ecology, Institute of Tibetan Plateau Research, Chinese  
Academy of Sciences, Beijing 100101, China

<sup>5</sup> Key Laboratory of Water Cycle and Related Land Surface Processes, Institute  
of Geographic Sciences and Natural Resources Research, Chinese Academy of  
Sciences, Beijing, 100101, China

<sup>6</sup> Center for Excellence in Tibetan Plateau Earth Science, Chinese Academy of  
Sciences, 100101, Beijing, China

<sup>7</sup> University of Chinese Academy of Sciences, 100049, Beijing, China

<sup>8</sup> Key Laboratory of Cenozoic Geology and Environment, Institute of Geology and  
Geophysics, Chinese Academy of Sciences, 100029, Beijing, China

<sup>9</sup> College of Earth and Environmental Sciences, Lanzhou University, Lanzhou,  
730000, China

<sup>10</sup> State Environmental Protection Key Laboratory of Synergetic Control and Joint  
Remediation for Soil & Water Pollution, Chengdu University of Technology, Chengdu  
610059, Chengdu, China

\*Shaoda Li, corresponding author at College of Earth Science, Chengdu University of  
Technology, Chengdu, China. Email: [1661348392@qq.com](mailto:1661348392@qq.com).

\*Xiaolu Tang, corresponding author at College of Ecology and Environment, Chengdu  
University of Technology, Chengdu, China. Email: [lxtt2010@163.com](mailto:lxtt2010@163.com).

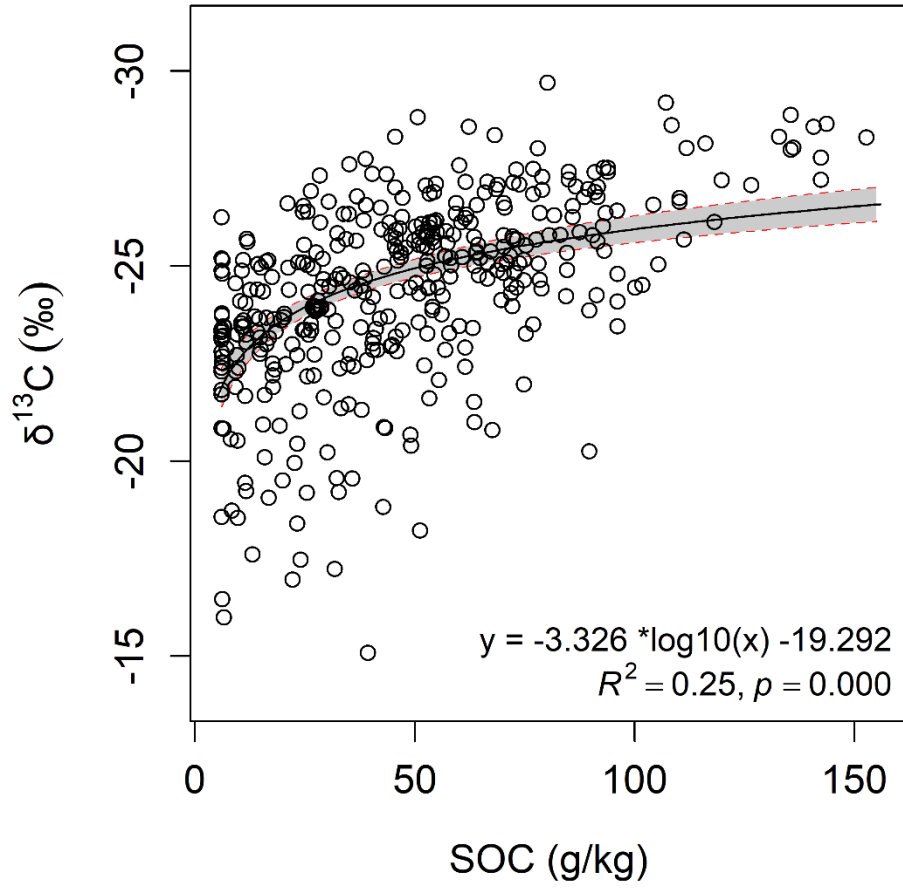

33

34 **Figure S1.** Relationships of soil δ<sup>13</sup>C with SOC content in 0-5 c

### Importance value of variables

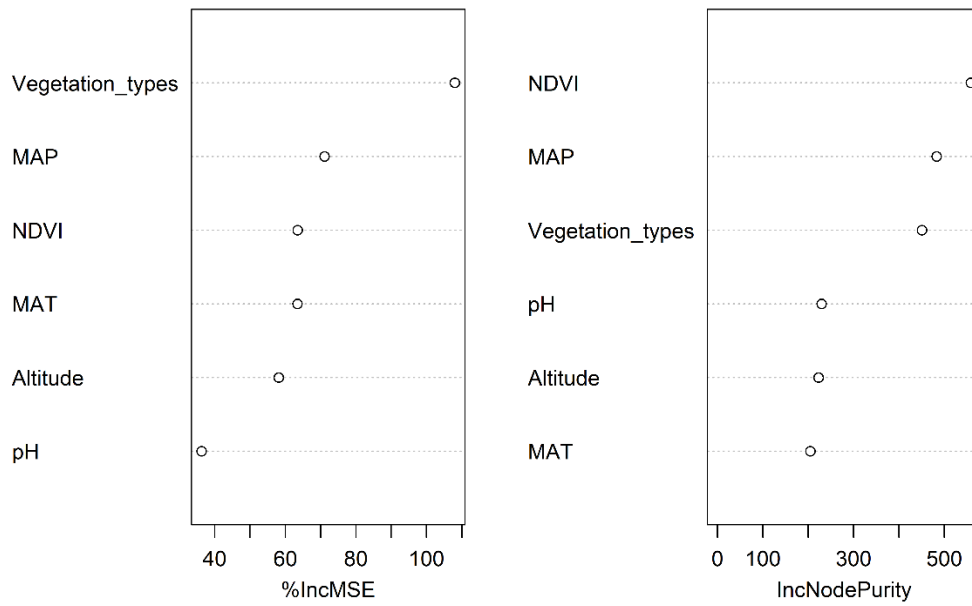

35

36 **Figure S2.** Importance of variables, denoted by percentage increase of mean-squared error  
37 (%IncMSE) (left) and the increase in node purity (IncNodePurity) (right), for topsoil  $\delta^{13}\text{C}$  estimation  
38 RF model built from training dataset without considering plot location uncertainty. Vegetation\_types,  
39 MAP, NDVI, MAT, Altitude, pH, represent the ecosystem types, annual mean precipitation,  
40 normalized difference vegetation index, elevation, soil pH, respectively.

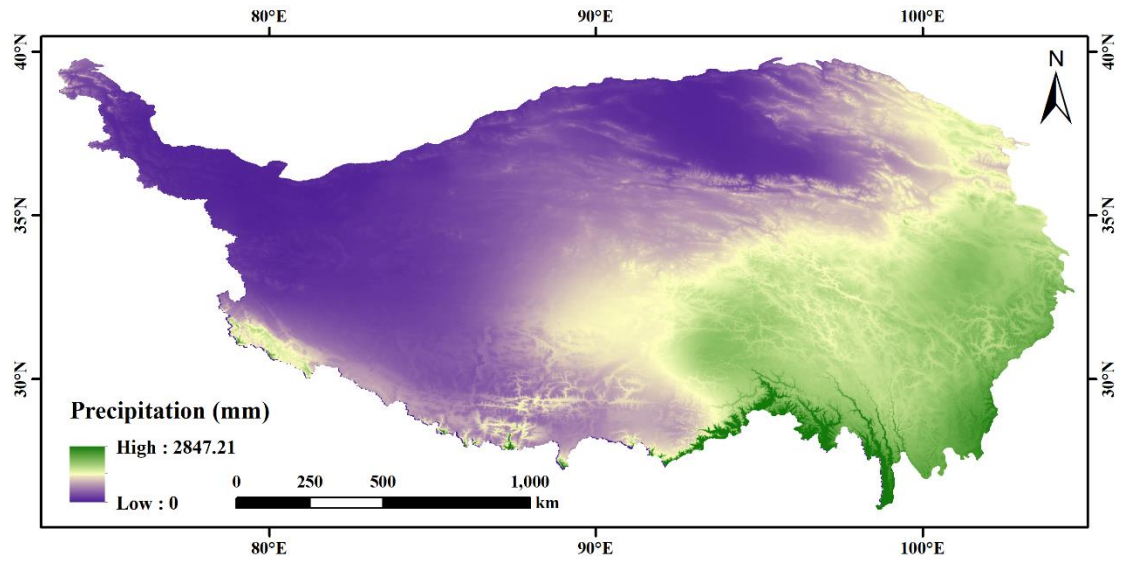

41

42 **Figure S3.** The distribution of precipitation during 2000-2010.

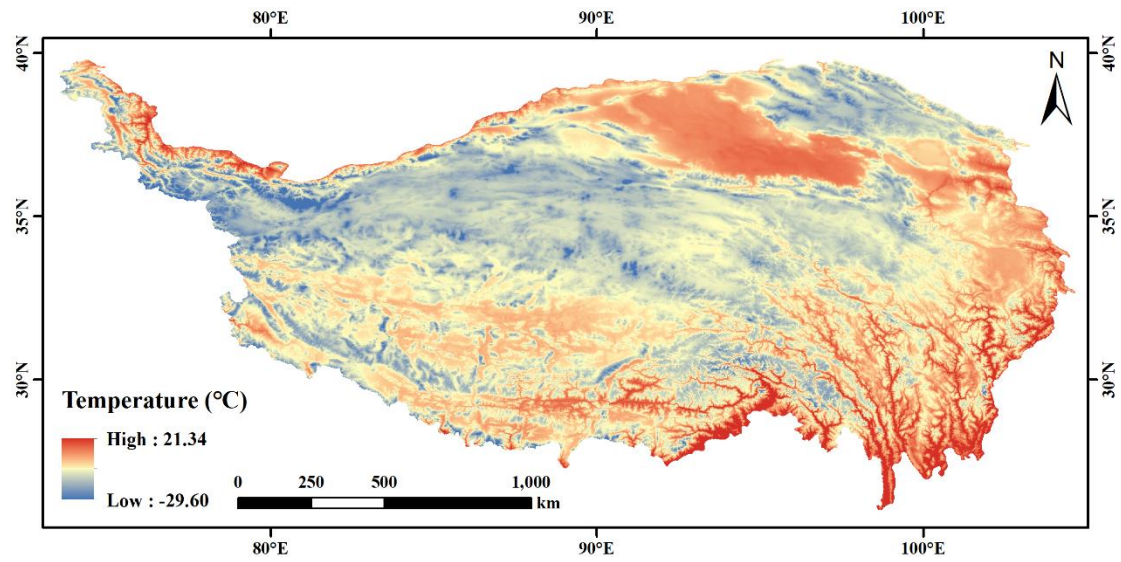

43

44 **Figure S4.** The distribution of temperature during 2000-2010.

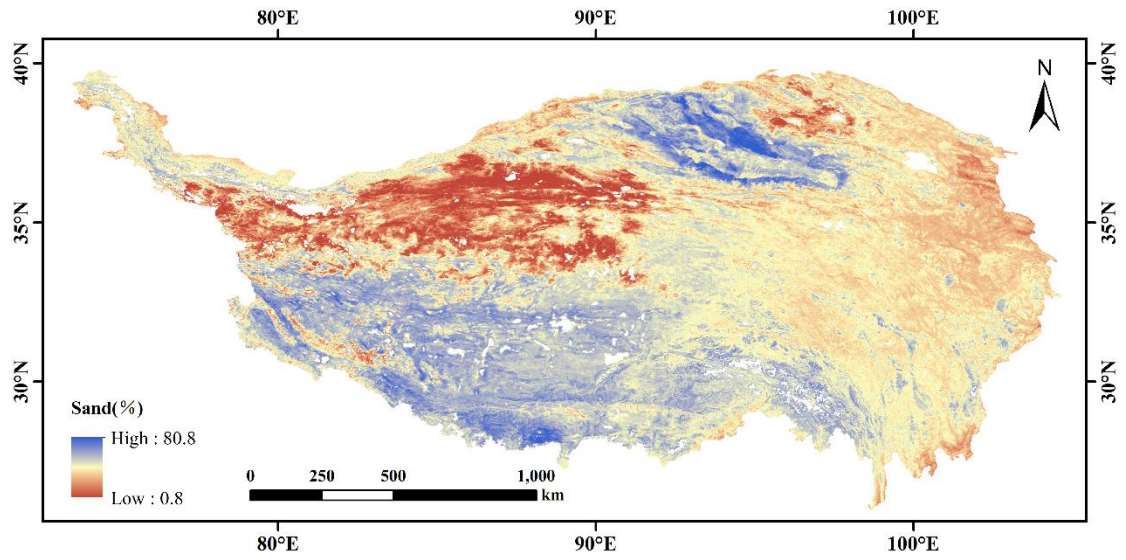

45

46 **Figure S5.** The distribution of soil sand content on the Tibetan Plateau.

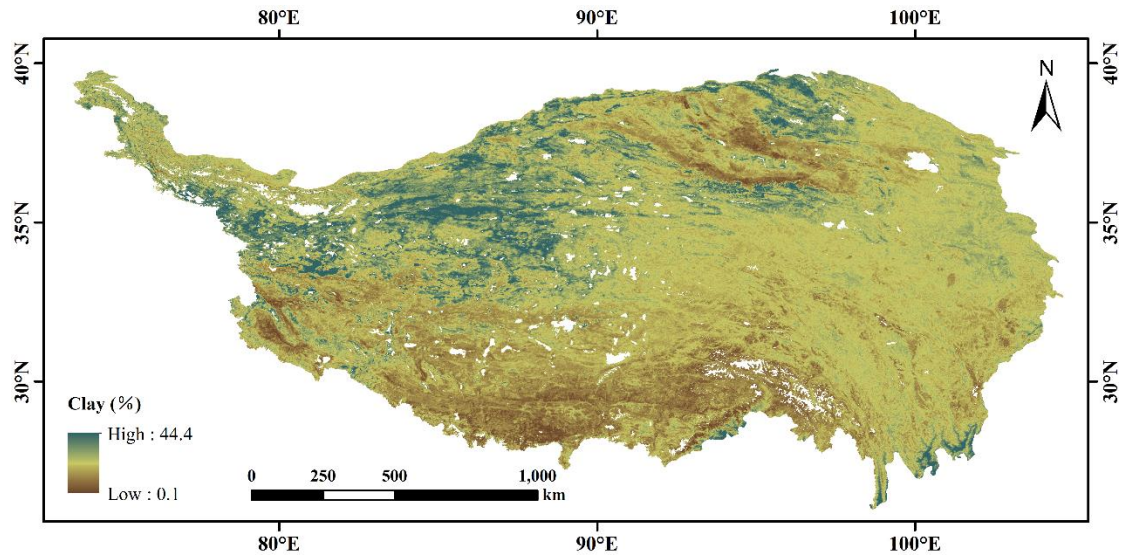

47

48 **Figure S6.** The distribution of soil clay content on the Tibetan Plateau.

**Table S1.** General descriptions of the dataset used in this study.

| Ecosystem types | N   | Mean  | Standard<br>Deviation | Minimum | Maximum |
|-----------------|-----|-------|-----------------------|---------|---------|
| Forests         | 103 | -26.3 | 1.60                  | -29.7   | -18.8   |
| Shrublands      | 59  | -24.3 | 2.00                  | -28.8   | -18.2   |
| Grasslands      | 218 | -23.9 | 1.84                  | -27.6   | -18.5   |
| Deserts         | 16  | -18.9 | 2.37                  | -22.5   | -15.1   |

50 N are the number of soil samples.
